# Supplementary material
Source: publisher figshare collection journal article supplement (https://tandf.figshare.com/ndownloader/files/16203272)
Supplement: Supplementary file 1 [file 16203272]

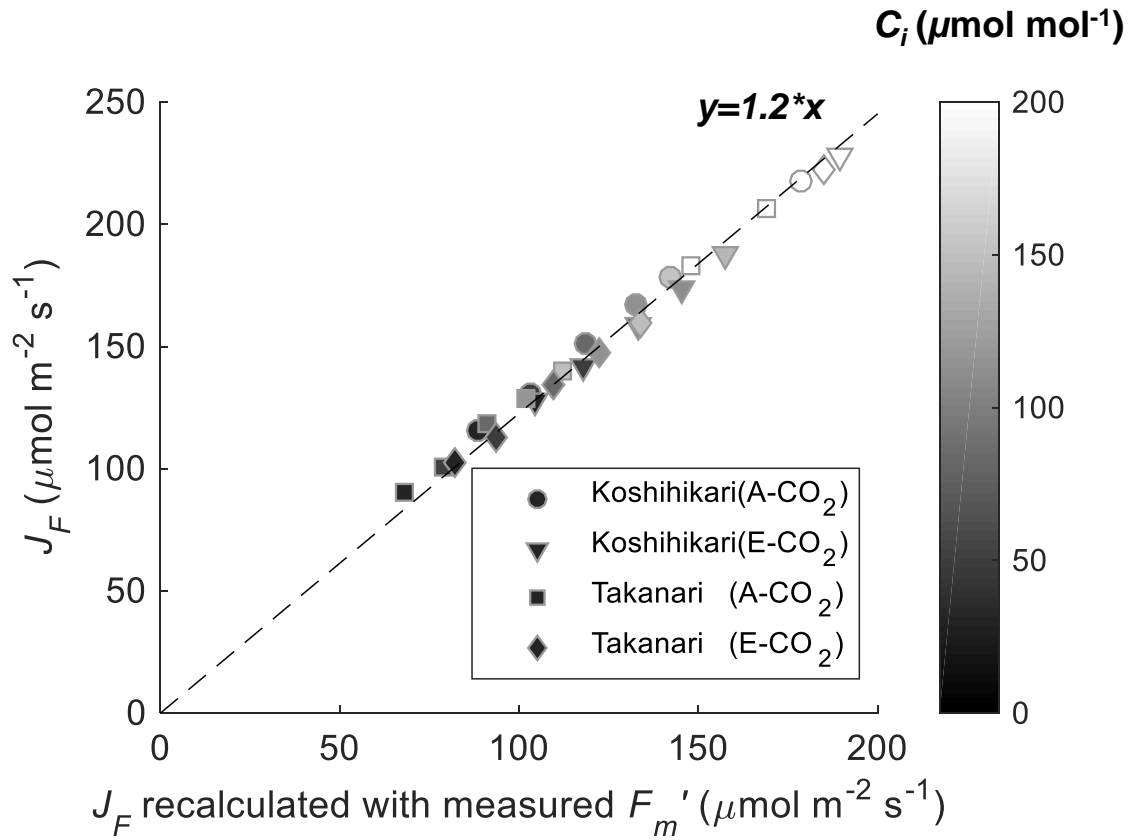

**Fig. S1** Electron transport rate based on the fluorometry ( $J_F$ ) calculated by the multiphase flash (MPF) method (Loriaux et al., 2013) on the y-axis and  $J_F$  based on the maximum fluorescence under illumination ( $F_m'$ ) measured at the peak flash under photosynthetic photon flux density (PPFD) at  $1,500 \mu\text{mol m}^{-2} \text{s}^{-1}$  on the x-axis. The gray scale bar shows intercellular  $\text{CO}_2$  concentration ( $C_i$ ). Any bias in the MPF method as compared with the traditional  $J_F$  estimation may be detected as a deviation from the regression through the origin of the plot. Data were collected on August 18, 2017.

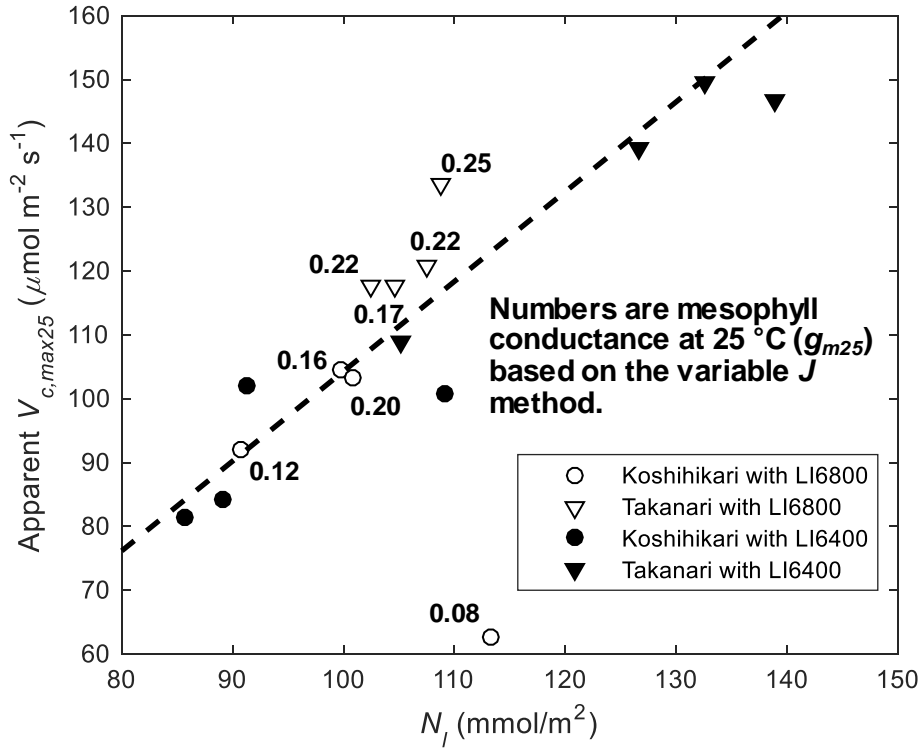

**Fig. S2** Maximum carboxylation rate calculated assuming mesophyll conductance was infinite (apparent  $V_{c,max25}$ ) in relation to leaf nitrogen content ( $N_l$ ). The relationship between apparent  $V_{c,max25}$  and  $N_l$  did not differ between those measured by LI-6400 (black) and by LI-6800 (white) even after one outlier point ( $g_{m25} = 0.08$ ) was removed ( $p = 0.1$ ). The data were independently collected at the heading stage (August 4–7) in 2017.
